## Correction: The optimal time of initiation of renal replacement therapy in acute kidney injury: A meta-analysis

**Kaiping Luo<sup>1,\*</sup>, Shufang Fu<sup>1,\*</sup>, Weidong Fang<sup>2</sup> and Gaosi Xu<sup>1</sup>**

<sup>1</sup> Department of Nephrology, The Second Affiliated Hospital of Nanchang University, Nanchang, China

<sup>2</sup> Department of Nephrology, People's Hospital of Ganzhou, Ganzhou, China

\* These authors have contributed equally to this work

**Published:** January 15, 2018

**Copyright:** Luo et al. This is an open-access article distributed under the terms of the Creative Commons Attribution License 3.0 (CC BY 3.0), which permits unrestricted use, distribution, and reproduction in any medium, provided the original author and source are credited.

This article has been corrected: Dr. Xu citation has been changed to affiliation 1 and affiliation 3 is now deleted.

Original article: Oncotarget. 2017; 8:68795-68808. <https://doi.org/10.18632/oncotarget.17946>
